# Supplementary material
Source: publisher site journal article supplement (https://www.kjim.org/upload/media/kjim-2025-171-Supplementary-Table-22.pdf)
Supplement: Supplementary file 1 [file kjim-2025-171-Supplementary-Table-22.pdf]

**Supplementary Table 22. Time persistence effect on other diseases of the gallbladder and the pancreas development following zoster vaccination**

| Time (yr)    | Events, n (%) | aHR (95% CI)                       |                                   |
|--------------|---------------|------------------------------------|-----------------------------------|
|              |               | Model 1 <sup>a)</sup>              | Model 2 <sup>b)</sup>             |
| < 1          |               |                                    |                                   |
| Unvaccinated | 5,005 (0.68)  | 1.0 (reference)                    | 1.0 (reference)                   |
| Vaccinated   | 4,706 (0.64)  | 0.94 (0.91 to 0.98) <sup>c)</sup>  | 0.93 (0.90 to 0.97) <sup>c)</sup> |
| 1–2          |               |                                    |                                   |
| Unvaccinated | 5,217 (0.71)  | 1.0 (reference)                    | 1.0 (reference)                   |
| Vaccinated   | 4,775 (0.65)  | 0.91 (0.88 to 0.952) <sup>c)</sup> | 0.91 (0.87 to 0.94) <sup>c)</sup> |
| 2–4          |               |                                    |                                   |
| Unvaccinated | 8,127 (1.11)  | 1.0 (reference)                    | 1.0 (reference)                   |
| Vaccinated   | 7,337 (1.00)  | 0.94 (0.91 to 0.97) <sup>c)</sup>  | 0.94 (0.91 to 0.97) <sup>c)</sup> |
| 4–6          |               |                                    |                                   |
| Unvaccinated | 4,746 (0.65)  | 1.0 (reference)                    | 1.0 (reference)                   |
| Vaccinated   | 4,059 (0.56)  | 0.98 (0.95 to 1.03)                | 0.98 (0.94 to 1.02)               |
| 6–8          |               |                                    |                                   |
| Unvaccinated | 1,416 (0.19)  | 1.0 (reference)                    | 1.0 (reference)                   |
| Vaccinated   | 1,153 (0.16)  | 1.02 (0.94 to 1.10)                | 0.97 (0.89 to 1.05)               |
| ≥ 8          |               |                                    |                                   |
| Unvaccinated | 38 (0.01)     | 1.0 (reference)                    | 1.0 (reference)                   |
| Vaccinated   | 42 (0.01)     | 1.48 (0.95 to 2.30)                | 1.45 (0.92 to 2.28)               |

aHR, adjusted hazard ratio; CI, confidence interval.

<sup>a)</sup>Models 1: adjusted for age (50–54, 55–59, 60–64, and ≥ 65 years) and sex.

<sup>b)</sup>Model 2: adjusted for age (50–54, 55–59, 60–64, and ≥ 65 years); sex; household income (low income, middle income, and high income); region of residence (urban and rural); Charlson comorbidity index (0, 1, and ≥ 2); obesity (underweight [ $< 18.5 \text{ kg/m}^2$ ], normal [ $18.5\text{--}22.9 \text{ kg/m}^2$ ], overweight [ $23.0\text{--}24.9 \text{ kg/m}^2$ ], and obese [ $\geq 25.0 \text{ kg/m}^2$ ]); blood pressure (systolic blood pressure  $< 140 \text{ mmHg}$  and diastolic blood pressure  $< 90 \text{ mmHg}$  and systolic blood pressure  $\geq 140 \text{ mmHg}$  or diastolic blood pressure  $\geq 90 \text{ mmHg}$ ); fasting blood glucose ( $< 100$  and  $\geq 100 \text{ mg/dL}$ ); glomerular filtration rate ( $< 60$ ,  $60\text{--}89$ , and  $\geq 90 \text{ mL/min/1.73 m}^2$ ); smoking status (non-, ex-, and current smoker); alcohol consumption (drinks;  $< 1$ ,  $1\text{--}2$ ,  $3\text{--}4$ , and  $\geq 5$  days per week); aerobic physical activity (sufficient and insufficient); and history of medication use for coronary artery disease, diabetes mellitus, dyslipidemia, and hypertension.

<sup>c)</sup>Significant differences ( $p < 0.05$ ).
